# Supplementary material
Source: PubMed Central journal article supplement (PMC3048909)
Supplement: NIHMS273954-supplement-1_si_001.pdf [file NIHMS273954-supplement-1_si_001.pdf]

**Synthesis of 2-(Substituted phenyl)-3,5,5-trimethylmorpholine Analogues and  
Their Effects on Monoamine Uptake, Nicotinic Acetylcholine Receptor Function,  
and Behavioral Effects of Nicotine**

F. Ivy Carroll,<sup>\*,a</sup> Ana Z. Muresan,<sup>a</sup> Bruce E. Blough,<sup>a</sup> Hernán A. Navarro,<sup>a</sup> S. Wayne Mascarella,<sup>a</sup> J. Brek Eaton,<sup>c</sup> Xiaodong Huang,<sup>a</sup> M. Imad Damaj,<sup>b</sup> Ronald J. Lukas<sup>c</sup>

<sup>a</sup>Center for Organic and Medicinal Chemistry, Research Triangle Institute, P. O Box 12194, Research Triangle Park, NC 27709-2194, USA; <sup>b</sup>Department of Pharmacology and Toxicology, Virginia Commonwealth University Medical Center, Richmond, VA 23298-0613, USA; <sup>c</sup>Division of Neurobiology, Barrow Neurological Institute, 350 West Thomas Road, Phoenix, AZ 85013, USA

\*Corresponding Author:

Dr. F. Ivy Carroll

Center for Organic and Medicinal Chemistry

Research Triangle Institute

P. O. Box 12194

Research Triangle Park, NC 27709-2194, USA

voice: 1.919.541.6679

fax: 1.919.541.8868

email: [fic@rti.org](mailto:fic@rti.org)

**Supporting Information**

## Analysis Data

| Compound                                                     | Formula                                                                 | Calculated |      |      | Found |      |      |
|--------------------------------------------------------------|-------------------------------------------------------------------------|------------|------|------|-------|------|------|
|                                                              |                                                                         | C          | H    | N    | C     | H    | N    |
| (2 <i>S</i> ,3 <i>S</i> )- <b>5a</b> Hemi-D-tartrate         | C <sub>15</sub> H <sub>21</sub> ClNO <sub>4</sub> •0.25H <sub>2</sub> O | 56.43      | 6.79 | 4.39 | 56.63 | 6.84 | 4.31 |
| (2 <i>R</i> ,3 <i>R</i> )- <b>5a</b> Hemi-L-tartrate         | C <sub>15</sub> H <sub>21</sub> ClNO <sub>4</sub>                       | 57.23      | 6.72 | 4.45 | 57.12 | 6.80 | 4.46 |
| (2 <i>S</i> ,3 <i>S</i> )- <b>5b</b> Hemi-D-tartrate         | C <sub>15</sub> H <sub>21</sub> FNO <sub>4</sub> •0.25H <sub>2</sub> O  | 59.49      | 7.16 | 4.63 | 59.69 | 7.00 | 4.61 |
| (2 <i>S</i> ,3 <i>S</i> )- <b>5c</b> Hemi-D-tartrate         | C <sub>15</sub> H <sub>21</sub> BrNO <sub>4</sub>                       | 50.15      | 5.89 | 3.90 | 49.95 | 5.83 | 3.78 |
| (2 <i>S</i> ,3 <i>S</i> )- <b>5d</b> Hydrochloride           | C <sub>14</sub> H <sub>21</sub> Cl <sub>2</sub> NO                      | 57.94      | 7.29 | 4.83 | 57.84 | 7.42 | 4.86 |
| (2 <i>S</i> ,3 <i>S</i> )- <b>5e</b> Di-p-toluoyl-L-tartrate | C <sub>35</sub> H <sub>40</sub> ClNO <sub>9</sub>                       | 64.26      | 6.16 | 2.14 | 64.07 | 6.13 | 2.09 |
| (2 <i>S</i> ,3 <i>S</i> )- <b>5f</b> Di-p-toluoyl-L-tartrate | C <sub>36</sub> H <sub>42</sub> ClNO <sub>9</sub>                       | 64.71      | 6.34 | 2.10 | 64.37 | 6.29 | 2.20 |
| (2 <i>S</i> ,3 <i>S</i> )- <b>5g</b> Hemi-D-tartrate         | C <sub>16</sub> H <sub>23</sub> ClNO <sub>4</sub> •0.25H <sub>2</sub> O | 57.66      | 7.11 | 4.20 | 57.95 | 6.96 | 4.15 |
| (2 <i>S</i> ,3 <i>S</i> )- <b>5h</b> Hemi-D-tartrate         | C <sub>17</sub> H <sub>25</sub> ClNO <sub>4</sub>                       | 59.56      | 7.35 | 4.09 | 59.46 | 7.43 | 4.09 |
